# Comparative Proteomic Analysis of Aluminum Tolerance in Tibetan Wild and Cultivated Barleys

Huaxin Dai<sup>1</sup>, Fangbin Cao<sup>1</sup>, Xianhong Chen<sup>1</sup>, Mian Zhang<sup>1</sup>, Imrul Mosaddek Ahmed<sup>1</sup>, Zhong-Hua Chen<sup>2</sup>, Chengdao Li<sup>3</sup>, Guoping Zhang<sup>1\*</sup>, Feibo Wu<sup>1\*</sup>

**1** Department of Agronomy, College of Agriculture and Biotechnology, Zijingang Campus, Zhejiang University, Hangzhou, P.R. China, **2** School of Science and Health, Hawkesbury Campus, University of Western Sydney, New South Wales, Australia, **3** Department of Agriculture, Government of Western Australia, South Perth, Western Australia, Australia

## Abstract

Aluminum (Al) toxicity is a major limiting factor for plant production in acid soils. Wild barley germplasm is rich in genetic diversity and may provide elite genes for crop Al tolerance improvement. The hydroponic-experiments were performed to compare proteomic and transcriptional characteristics of two contrasting Tibetan wild barley genotypes Al-resistant/tolerant XZ16 and Al-sensitive XZ61 as well as Al-resistant *cv.* Dayton. Results showed that XZ16 had less Al uptake and translocation than XZ61 and Dayton under Al stress. Thirty-five Al-tolerance/resistance-associated proteins were identified and categorized mainly in metabolism, energy, cell growth/division, protein biosynthesis, protein destination/storage, transporter, signal transduction, disease/defense, etc. Among them, 30 were mapped on barley genome, with 16 proteins being exclusively up-regulated by Al stress in XZ16, including 4 proteins (S-adenosylmethionine-synthase 3, ATP synthase beta subunit, triosephosphate isomerase, Bp2A) specifically expressed in XZ16 but not Dayton. The findings highlighted the significance of specific-proteins associated with Al tolerance, and verified Tibetan wild barley as a novel genetic resource for Al tolerance.

**Citation:** Dai H, Cao F, Chen X, Zhang M, Ahmed IM, et al. (2013) Comparative Proteomic Analysis of Aluminum Tolerance in Tibetan Wild and Cultivated Barleys. PLoS ONE 8(5): e63428. doi:10.1371/journal.pone.0063428

**Editor:** Tianzhen Zhang, Nanjing Agricultural University, China

**Received:** January 10, 2013; **Accepted:** April 3, 2013; **Published:** May 14, 2013

**Copyright:** © 2013 Dai et al. This is an open-access article distributed under the terms of the Creative Commons Attribution License, which permits unrestricted use, distribution, and reproduction in any medium, provided the original author and source are credited.

**Funding:** This study was financially supported by the National 863 program (2012AA101105) and the National Natural Science Foundation of China (30630047). The funders had no role in study design, data collection and analysis, decision to publish, or preparation of the manuscript.

**Competing Interests:** The authors have declared that no competing interests exist.

\* E-mail: wufeibo@zju.edu.cn (FBW); zhanggp@zju.edu.cn (GPZ)

## Introduction

Ionic aluminum (Al<sup>3+</sup>), highly toxic to plant growth, is a major factor limiting crop productivity on acid soils [1]. The strategies for maintaining production on acid soils include lime application to raise soil pH and use of plants with high tolerance to acid soils. Development and planting of Al tolerant cultivars is a cost-effective and practically acceptable approach for full utilization of acid soil [2].

Barley (*Hordeum vulgare* L.) is one of the most Al-sensitive species among small grain cereals [3]. Al toxicity limits the growth and productivity of barley on acid soils and its expansion as a crop into many agricultural areas in the world [4]. In order to breed barley cultivars tolerant to Al toxicity, it is especially important to identify genetic resources with Al tolerance. Wild barley germplasm is rich in useful genes for crop improvement [5]. Tibetan annual wild barley from Qinghai-Tibet Plateau is regarded as one of the progenitors of cultivated barley and is rich in genetic diversity [6]. We successfully identified Tibetan wild annual barley genotypes with high tolerance to both low pH and Al stress [7]. However, their underlying physiological and molecular mechanisms in Al tolerance remain unclear.

Comparative proteomic analysis and bioinformatics techniques provide powerful tools to identify proteins expressed under abiotic stress [8]. Root proteomic analysis showed that proteins involved in stress defense, metabolisms and signal transduction were

important for soybean [9], tomato [10] and Arabidopsis [11] plants survival under Al toxicity. However, only limited information is available on Al accumulation/translocation and Al tolerance mechanisms in barley. Moreover, physiological and proteomic responses to Al stress in Tibetan wild barley genotypes have never been investigated and compared with elite Al-tolerant barley cultivars. Thus, precise knowledge of the proteomic basis is required to dissect the mechanisms underlying acid/Al tolerance in wild barley. In the present study we examined stress-specific proteins for acid/Al tolerance in wild barley by comparing the proteomic responses of the two Tibetan wild barley genotypes XZ16 (high acid/Al tolerant), XZ61 (acid/Al sensitive) and Al-tolerant *cv.* Dayton using two-dimensional gel electrophoresis (2-D) and mass spectrometry (MS). These results are useful to better understand the mechanisms of Al tolerance in barley, and provide an effective pathway for the exploration of Al-tolerant genes in plants.

## Materials and Methods

### Plant Materials and Experimental Design

Hydroponic experiments were performed using two Tibetan annual wild barley XZ16 and XZ61 (*H. vulgare* L. *ssp.* *spontaneum*), acid/Al-tolerant and sensitive genotypes, respectively, and one Al-tolerant-cultivar Dayton. Seeds were surface sterilized in 1% H<sub>2</sub>O<sub>2</sub> for 30 min, rinsed with distilled water, and then germinated

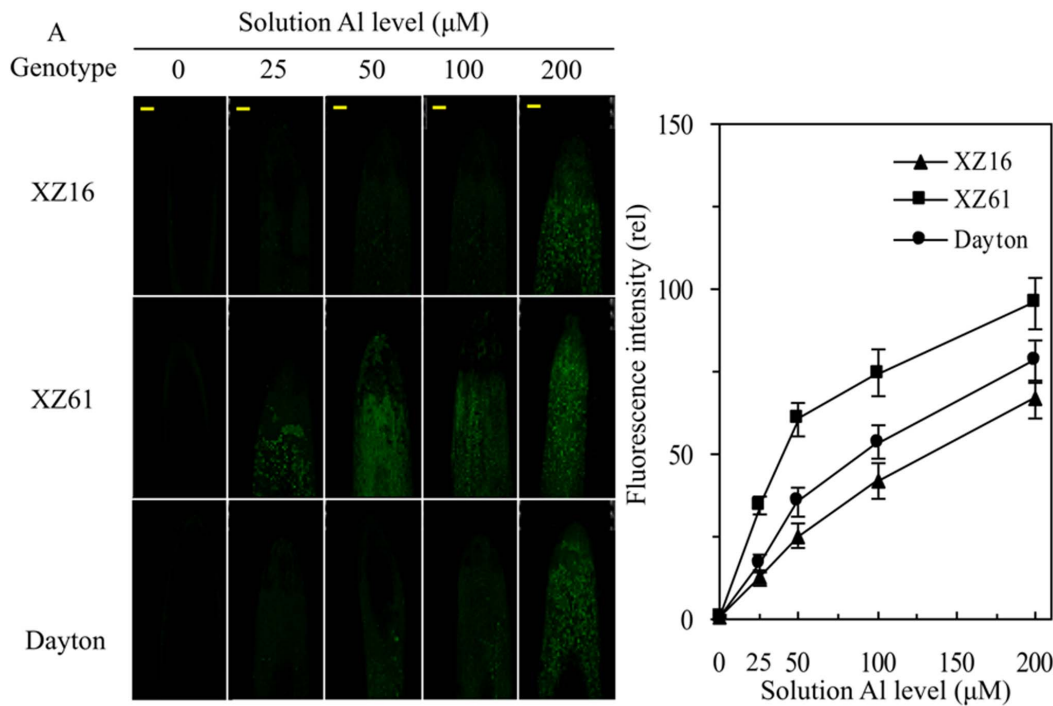

**Figure 1. Al localization in barley roots exposed to different Al levels for 24 h.** (A) Al was monitored by morin fluorescence using confocal laser scanning microscopy. Fluorescence intensity of image analysis was calculated using Image J software. (B) Seedlings were subjected to 0, 25, 50, 100 and 200 μM AlCl<sub>3</sub>, respectively, in 0.5 mM CaCl<sub>2</sub> solution at pH 4.3 for 24 h, and then root tips (0–10 mm) were stained with morin. Images shown in the Figures are representative of more than fifteen seedlings per treatment. Bar = 100 μm. Data are means ± SD (n = 5). doi:10.1371/journal.pone.0063428.g001

in sterilized moist quartz sand in an incubator at 20 ± 1°C. Seven-day-old uniform seedlings were transplanted into 5-L containers filled with 4.5 L basal nutrient solution (BNS). The composition of BNS was described in Wu *et al.* [12]. The container was covered with a polystyrol plate with 7 evenly spaced holes (2 plants per hole) and placed in a greenhouse. Solution was continuously aerated with pumps and renewed daily after Al addition. The solution pH was adjusted to 5.8 ± 0.1 with NaOH or HCl, as required.

On the day 7 after transplantation, seedlings were cultured for 1 d in 0.5 mM CaCl<sub>2</sub> at pH 4.3, and then exposed to 0, 50 or 200 μM Al in 0.5 mM CaCl<sub>2</sub> at pH 4.3 for 24 h. The plantlets were kept in a growth room at 25/20°C with a 14/10 h (day/night) photoperiod and irradiance of 340 μmol m<sup>-2</sup> s<sup>-1</sup> light intensity. A split-plot design was adopted with treatment as the main plot and genotype as sub-plot with five replicates in each treatment. At 3 days after treatment, plants were harvested from each treatment, and roots were washed with distilled water thoroughly and collected for two 2-DE experiments and qRT-PCR analysis. Dry weights of the plants were determined and used for Al concentration.

#### Determination of Al Concentration and Root Al Distribution

Al concentrations was determined after digestion in an acid mixture (HNO<sub>3</sub>:HClO<sub>4</sub> = 4:1, v/v) at 150°C for 10 h, using inductively coupled plasma atomic emission spectrometry (ICP/AES) (Thermo Jarrel Ash, San Jose, CA).

Morin staining for Al in the root tip region was determined according to Zheng *et al.* [13]. Briefly, 1-cm root tips were stained with 100 mM morin (Sigma-Aldrich, St. Louis, MO, USA) in 10 mM MES buffer (pH 5.5) for 30 min. Images were acquired

using a Leica TCS SP2 confocal laser scanning microscope (Leica Microsystems, Heidelberg, Germany) with excitation at 420 nm and emission at 515 nm.

#### Protein Extraction, Quantification, Visualization and Image Analysis

Total root protein extracts were prepared essentially according to phenol extraction method [14] with minor modification. Root sample (3 g) of control and Al treated plants were grounded in a mortar separately to a fine powder in liquid nitrogen and homogenized in an extraction buffer containing 30 mg PVPP. The homogenate was suspended in 7 ml ice-cold phenol extraction buffer (0.7 M sucrose; 0.1 M KCl; 50 mM EDTA, 0.5 M Tris-HCl, 1% w/v DTT, pH 7.5; complete protease inhibitor cocktail (Roche Applied Science)) and immediately added 7 ml ice-cold Tris buffered phenol and vortexed for 15 s. The sample was then vortexed for 10 s every 5 min and repeated for six times at 4°C. After centrifugation (30 min, 5000 ×g, 4°C) the phenolic phase was collected, and the sample was re-extracted with 14 ml of extraction buffer (added with the same volume of phenol extraction as collected items), and vortexed for 10 s every 5 min and repeated for six times at 4°C. After centrifugation (30 min, 5000 ×g, 4°C) the phenolic phase was collected and precipitated overnight with five volumes 100 mM ammonium acetate in methanol at -20°C. After centrifugation at 5000 ×g for 30 min at 4°C, the supernatant was removed and the pellet was rinsed twice in ice-cold acetone/0.2% DTT. Between the two rinsing steps, the sample was incubated for 60 min at -20°C. The pellet was air-dried, resuspended in 200 μl lysis buffer (7 M urea, 2 M thiourea, 4% CHAPS, 20 mM Tris-HCl, pH 7.4, containing 1% w/v DTT; Amersham Biosciences), and vortexed for 1 h at room temperature. Protein concentration was determined by

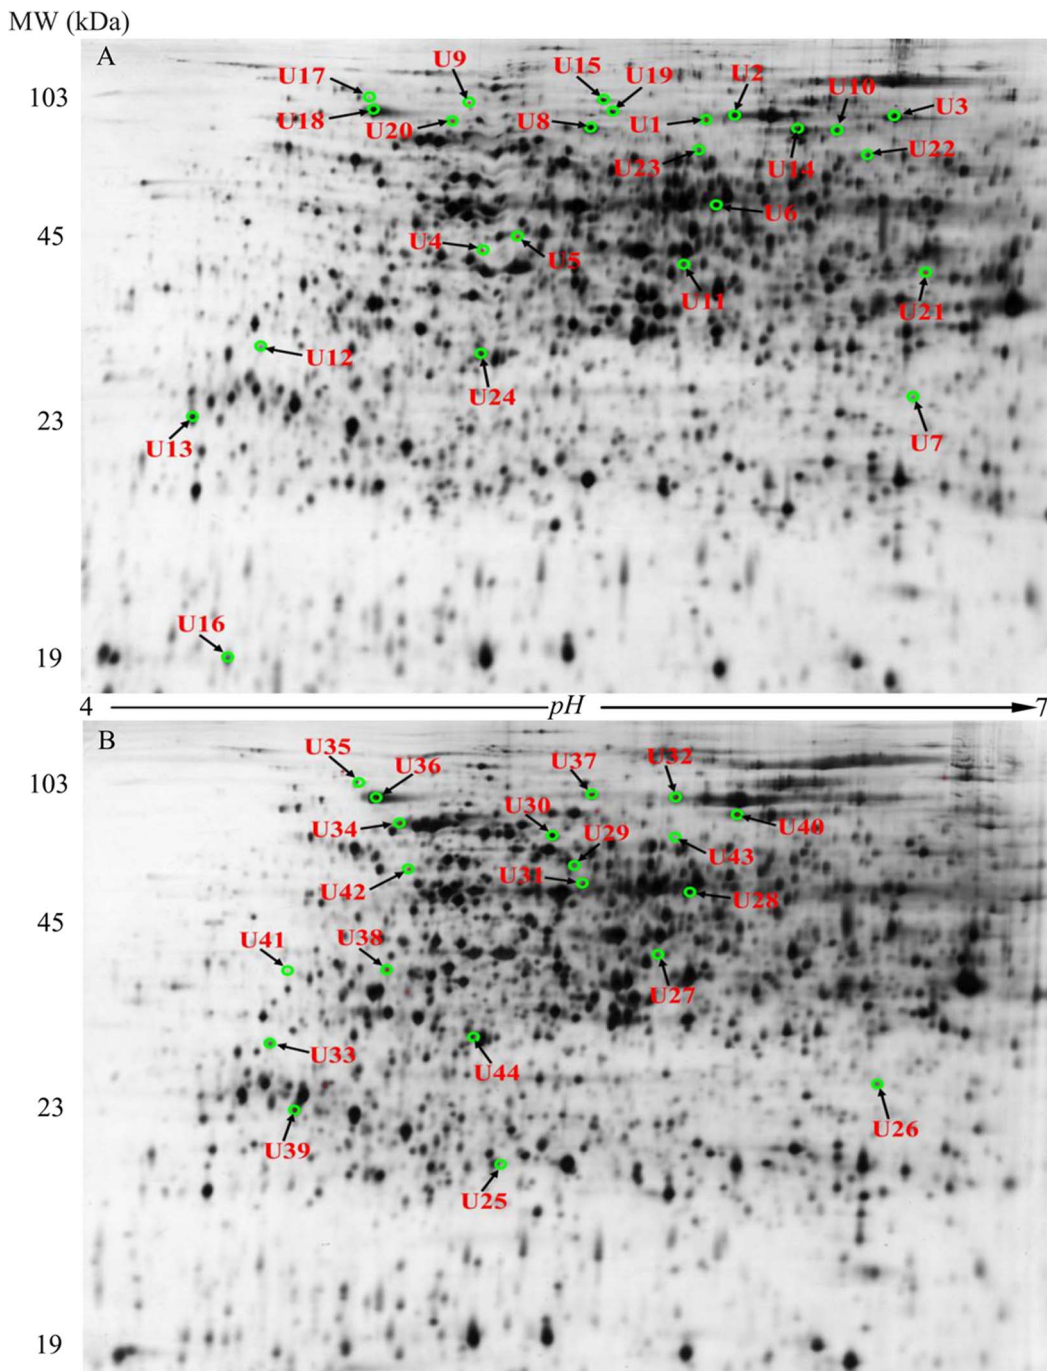

**Figure 2. Representative 2-DE maps of root proteins in XZ16 exposed to Al for 24 h.** The proteins were isolated from the root of XZ16 exposed to 50  $\mu\text{M}$  (A, upper) and 200  $\mu\text{M}$  (B, below) Al for 24 h. Total proteins were extracted and separated by 2-DE. In IEF, 100  $\mu\text{g}$  proteins were loaded onto pH 4–7 IPG strips (24 cm, linear). SDS-PAGE was performed with 12.5% gels. The spots were visualized by silver staining. Differentially accumulated protein spots are indicated by green sashes. Arrows indicate the differentially expressed protein spots whose expressions were significantly induced (fold changes  $\geq 1.5$ ) or unchanged ( $-1.50 < \text{folds} < 1.5$ ) in XZ16 but down-regulated (folds  $< -1.50$ ) in XZ61; or up-regulated in XZ16 but unchanged in XZ61, under 50  $\mu\text{M}$  Al (U1–U24) and 200  $\mu\text{M}$  Al (U25–U44) stress.  
doi:10.1371/journal.pone.0063428.g002

standard Bradford assay using bovine serum albumin as standard (Bio-Rad, Hercules, CA, USA). All chemicals used were, if not further specified in the text, p.a. or electrophoresis grade. All electrophoresis units employed were from Amersham Biosciences.

Protein visualization, image analysis and quantification were determined according to Bah *et al.* [15]. For each sample, at least

three independent protein extracts were prepared after each treatment and at least three 2-DE analyses were performed for each protein extract. To analyze the expressed protein patterns, stained gels were scanned and calibrated using a PowerLook1100 scanner (UMAX), followed by analysis of protein spots using GE HealthCare Software (Amersham Biosciences). Spot detection was

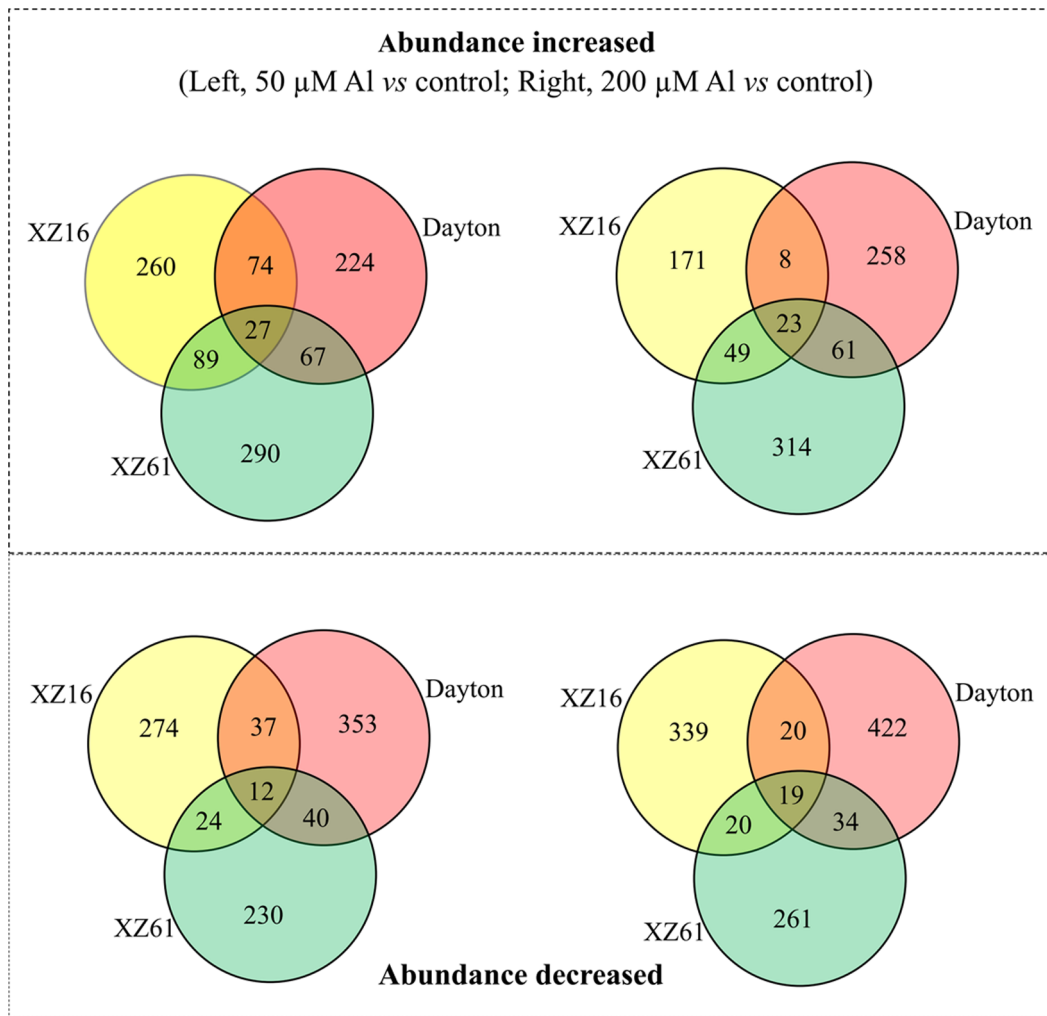

**Figure 3. Venn diagram illustrating the expression patterns of Al stress-responsive proteins in roots of XZ16, XZ61 and Dayton.** The numbers of differentially expressed spots up- or down-regulated are shown in the different segments. As to protein spots altered by 50 and 200  $\mu\text{M}$  Al stress, 450, 473, 392 spots (50  $\mu\text{M}$  Al vs control) and 251, 447, 350 spots (200  $\mu\text{M}$  Al vs control) were up-regulated in XZ16, XZ61, Dayton, respectively; while 347, 306, 442, and 398, 334, 495 spots down-regulated. The abundance of 101, 31 spots increased in both of XZ16 and Dayton under 50, 200  $\mu\text{M}$  Al stress, respectively, and that of 49, 39 decreased. doi:10.1371/journal.pone.0063428.g003

realized without spot editing. The protein spots were quantified using the % volume criterion. Only those with significant and reproducible changes ( $P < 0.05$ ) were considered to be differentially accumulated proteins. The target protein spots were automatically excised from the stained gels and digested with trypsin using a Spot Handling Workstation (Amersham Biosciences). Peptides gel pieces were placed into the EP tube and washed with 1:1 mixture of 50  $\mu\text{L}$  of 30 mM  $\text{K}_3\text{Fe}(\text{CN})_6$  and 100 mM  $\text{Na}_2\text{S}_2\text{O}_3$  for 10–15 min until completely discolored then washed with 200  $\mu\text{L}$  bi-distilled water (two times for 5 min each). The washed solution was drained and washed with 50% ACN (acetonitrile, Fisher A/0626/17) and 100% ACN rotationally, and then incubated in 25 mM  $\text{NH}_4\text{HCO}_3$  (ammonium bicarbonate, Sigma A6141) for 5 min at 37°C. After leaching out of the incubation solvent, 50% ACN and 100% ACN was rotationally added and dried at 40°C for 5 min respectively. Trypsin digestion was carried out as follows: sequencing-grade porcine trypsin (Promega, Madison, WI, USA) was suspended in 25 mM  $\text{NH}_4\text{HCO}_3$  at a concentration of 12.5 ng per  $\mu\text{L}$  to rehydrate the dried gel pieces. The trypsin digestion was carried out for 16 h at 37°C. Peptides were extracted

from the digest as follows for three times: 10  $\mu\text{L}$  of 50% ACN containing 0.1% TFA (trifluoroacetic acid, GE HealthCare) was added to each tube and incubated for 5 min at 37°C and the supernatants were transferred to new EP tube. The extracts were pooled and then vacuum concentrated for about 2 h. A solution of peptides was filtrated via Millipore (Millipore ZTC18M096) and mixed with the same volume of a matrix solution consisting of saturated  $\alpha$ -cyano-4-hydroxycinnamic acid (CHCA) in 50% ACN containing 0.1% TFA. After the peptides were co-crystallized with CHCA by evaporating organic solvents, tryptic-digested peptide masses were measured using a MALDI-TOF-TOF mass spectrometer (ABI4700 System, USA). All mass spectra were recorded in positive reflector mode and generated by accumulating data from 1000 laser shots. The following threshold criteria and settings were used: detected mass range of 700–3200 Da (optimal resolution for the quality of 1500 Da), using a standard peptide mixture (des-Arg1-Bradykinin Mr904.468, Angiotensin I Mr1296.685, Glul-Fibrinopeptide B Mr1570.677, ACTH (1–17) Mr2093.087, ACTH (18–39) Mr2465.199; ACTH (7–38) Mr3657.929) as an external standard calibration, with laser

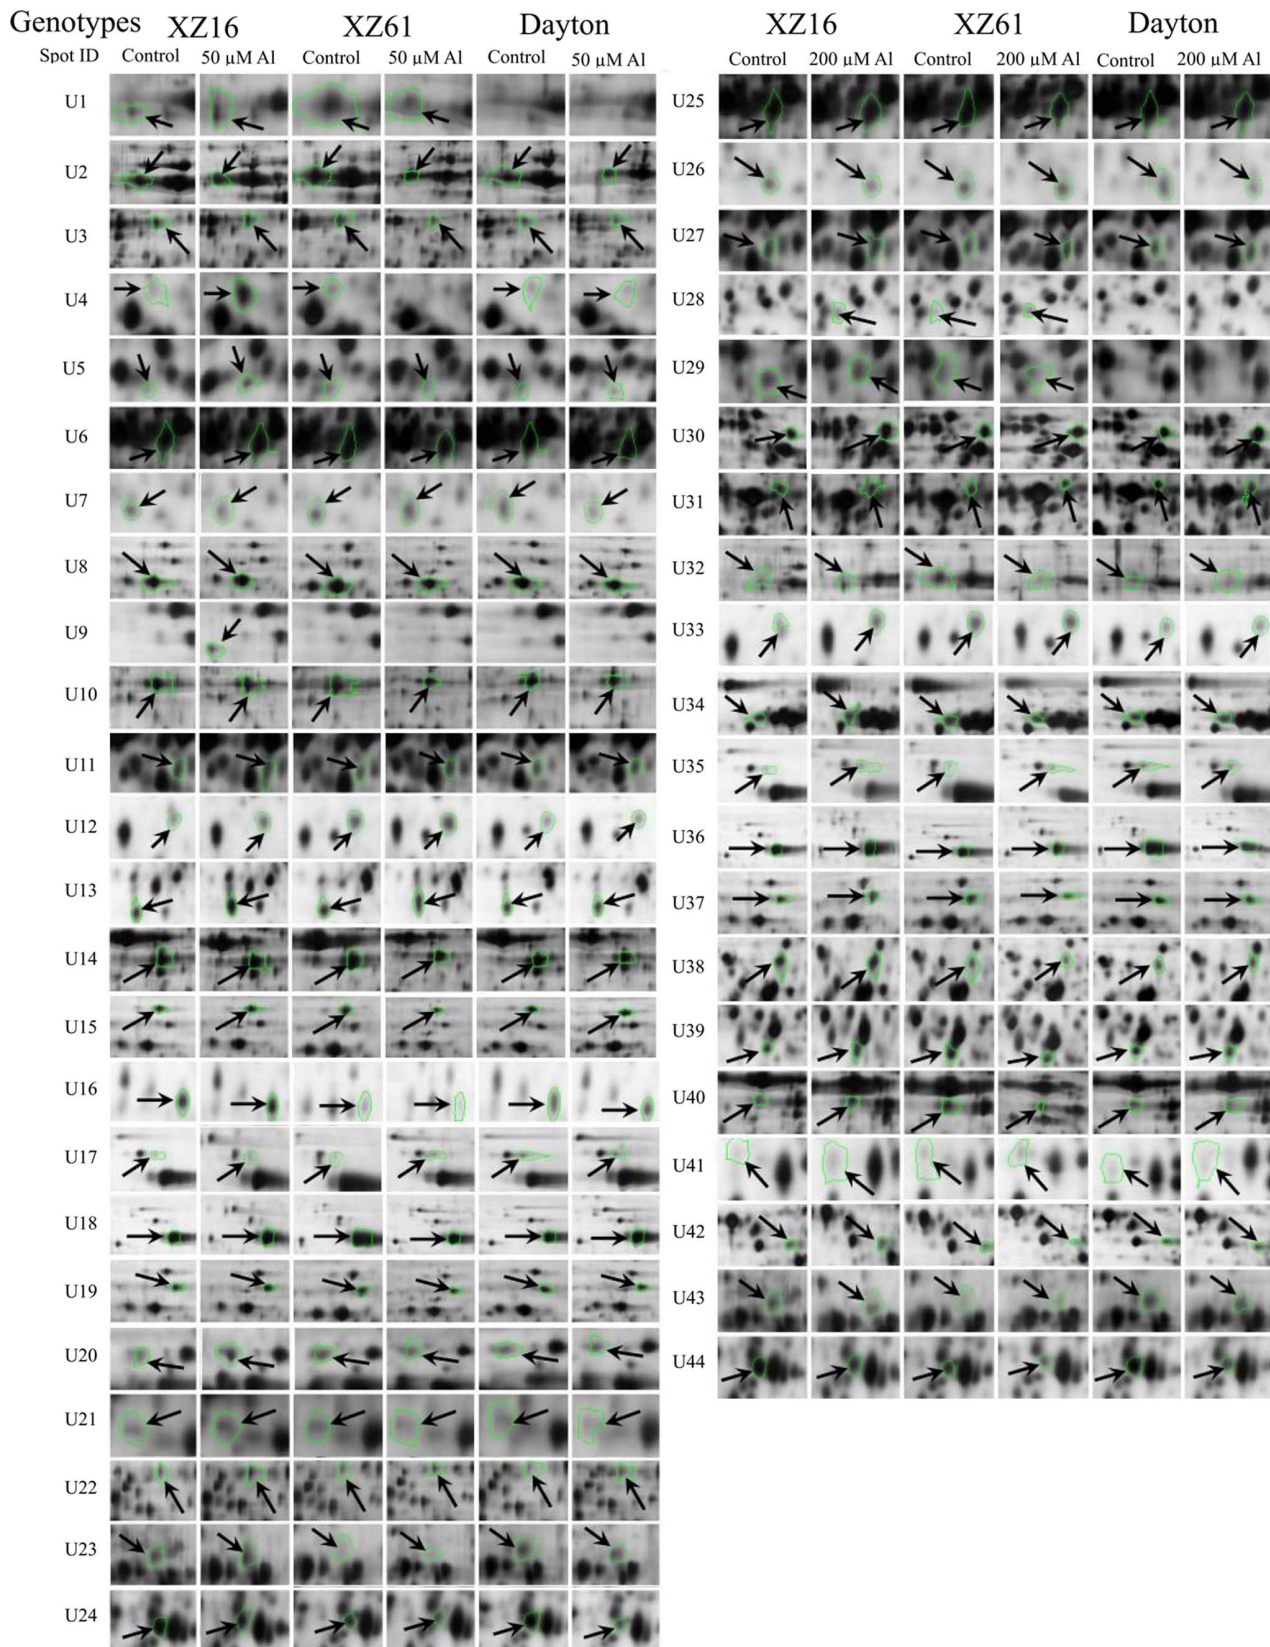

**Figure 4. ‘Spot view’ of the abundance of differentially expressed proteins in roots of barley seedlings under 50 or 200  $\mu\text{M}$  Al for 24 h.** The images of three genotypes: XZ16, XZ61 and Dayton (indicated with green circles) from control and 50 or 200  $\mu\text{M}$  Al (pH 4.3) treated plants. Protein spot ID refers to numbers in Figure 4 and Tables 1, 2.  
doi:10.1371/journal.pone.0063428.g004

**Table 1.** Proteins whose expression were significantly induced (+) in XZ16 roots but down-regulated (–)/unchanged in XZ61, or unchanged in XZ16 but down-regulated in XZ61 under 50  $\mu$ M Al stress.

| Spot ID                     | Protein name                                                                         | Accession number | MW Da  | pI   | AASC % | MP | Folds (Al vs control) |                  |        |
|-----------------------------|--------------------------------------------------------------------------------------|------------------|--------|------|--------|----|-----------------------|------------------|--------|
|                             |                                                                                      |                  |        |      |        |    | XZ16                  | XZ61             | Dayton |
| Metabolism                  |                                                                                      |                  |        |      |        |    |                       |                  |        |
| U1                          | S-adenosylmethionine synthase 3 [ <i>Hordeum. vulgare</i> subsp. <i>vulgare</i> ]    | gi 122220777     | 43138  | 5.51 | 42     | 11 | +2.39                 | –2.44            | 0.00   |
| U2                          | Methionine synthase [ <i>H. vulgare</i> subsp. <i>vulgare</i> ]                      | gi 50897038      | 84794  | 5.68 | 35     | 19 | –1.34                 | –3.39            | –2.23  |
| U3                          | Methionine synthase [ <i>H. vulgare</i> subsp. <i>vulgare</i> ]                      | gi 50897038      | 84794  | 5.68 | 22     | 12 | –1.24                 | –2.68            | +1.02  |
| U4                          | Glutamine synthetase [ <i>Arabidopsis thaliana</i> ]                                 | gi 228456        | 47123  | 6.73 | 15     | 7  | +6.50                 | –10 <sup>6</sup> | –1.09  |
| U5                          | $\gamma$ -glutamylcysteine synthetase [ <i>Triticum aestivum</i> ]                   | gi 57903694      | 43079  | 5.30 | 20     | 9  | +4.25                 | –2.74            | –3.50  |
| U6                          | Putative aspartate aminotransferase [ <i>H. Vulgare</i> subsp. <i>vulgare</i> ]      | gi 89511843      | 45377  | 5.75 | 14     | 4  | +1.80                 | –1.34            | +1.36  |
| U7                          | Predicted pirin-like protein [ <i>Brachypodium distachyon</i> ]                      | gi 357114735     | 41337  | 9.37 | 17     | 8  | +1.32                 | –1.72            | +1.36  |
| Energy                      |                                                                                      |                  |        |      |        |    |                       |                  |        |
| U8                          | Os06g0133800 [ <i>Oryza sativa japonica</i> ]                                        | gi 115466224     | 73973  | 5.44 | 16     | 10 | +1.07                 | –1.60            | +1.04  |
| U9                          | ATP synthase beta subunit [ <i>Triticum. monococcum</i> ]                            | gi 525291        | 59326  | 5.56 | 19     | 7  | +10 <sup>6</sup>      | 0.00             | 0.00   |
| U10                         | Aconitate hydratase 3 [ <i>Citrus clementina</i> ]                                   | gi 285309967     | 98669  | 5.89 | 10     | 9  | –1.03                 | –2.53            | +1.04  |
| U11                         | Fructose-bisphosphate aldolase [ <i>H. vulgare</i> ]                                 | gi 226316443     | 39071  | 6.08 | 29     | 7  | +1.71                 | +1.10            | +1.16  |
| Cell growth/division        |                                                                                      |                  |        |      |        |    |                       |                  |        |
| U12                         | Predicted proliferating cell nuclear antigen-like [ <i>Brachypodium distachyon</i> ] | gi 357137519     | 29514  | 4.61 | 14     | 5  | +1.69                 | +1.33            | +1.04  |
| Protein biosynthesis        |                                                                                      |                  |        |      |        |    |                       |                  |        |
| U13                         | Putative elongation factor 1 beta [ <i>H. vulgare</i> ]                              | gi 7711024       | 24716  | 4.52 | 34     | 7  | +1.86                 | +1.29            | +1.18  |
| Protein destination/storage |                                                                                      |                  |        |      |        |    |                       |                  |        |
| U14                         | HSP organizing protein/stress-inducible protein [ <i>Dactylis glomerata</i> ]        | gi 281399029     | 64793  | 6.11 | 10     | 5  | +1.07                 | –1.81            | –1.10  |
| U15                         | Heat shock protein 93-V [ <i>A. Lyrata</i> subsp. <i>lyrata</i> ]                    | gi 297795893     | 103611 | 6.36 | 35     | 30 | +1.06                 | –1.94            | +1.12  |
| U16                         | Os01g0839700 [ <i>O. sativa japonica</i> ]                                           | gi 115440951     | 19059  | 5.34 | 21     | 3  | –1.03                 | –1.93            | –1.12  |
| U17                         | Heat shock protein [ <i>Spinacia oleracea</i> ]                                      | gi 425194        | 71231  | 5.15 | 22     | 12 | +2.08                 | +1.01            | +1.10  |
| U18                         | Cytosolic heat shock protein 90 [ <i>H. vulgare</i> ]                                | gi 32765549      | 80654  | 4.96 | 27     | 15 | +1.21                 | –1.99            | +1.63  |
| U19                         | Cytosolic heat shock protein 90 [ <i>H. vulgare</i> ]                                | gi 32765549      | 80654  | 4.96 | 17     | 9  | +1.01                 | –1.81            | +1.03  |
| Signal transduction         |                                                                                      |                  |        |      |        |    |                       |                  |        |
| U20                         | RNA-binding Ras-GAP SH3 binding protein [ <i>T. aestivum</i> ]                       | gi 290579509     | 45493  | 4.95 | 18     | 7  | +1.60                 | –1.51            | –1.11  |
| Unknown                     |                                                                                      |                  |        |      |        |    |                       |                  |        |
| U21                         | Hypothetical protein SORBIDRAFT_10g022570 [ <i>Sorghum bicolor</i> ]                 | gi 242096224     | 47231  | 6.08 | 13     | 7  | +1.80                 | –1.57            | –1.03  |
| U22                         | Hypothetical protein LOC100383520 [ <i>Z. mays</i> ]                                 | gi 293336836     | 77345  | 6.03 | 16     | 11 | +1.59                 | +1.29            | +1.26  |
| U23                         | Predicted protein [ <i>H. vulgare</i> subsp. <i>vulgare</i> ]                        | gi 326513540     | 58531  | 6.05 | 22     | 40 | +2.19                 | +1.23            | –1.72  |
| U24                         | Predicted protein [ <i>H. vulgare</i> subsp. <i>vulgare</i> ]                        | gi 326513418     | 35914  | 5.06 | 22     | 9  | +1.08                 | –2.60            | –1.36  |

AASC, Amino acid sequence coverage; MP, Matched peptides.

Protein spot ID refers to numbers in Fig. 7. Accession number of top database match from the NCBI database. 'Al vs control' referred to fold variation of Al exposed vs unexposed plants. Fold increase and decrease were calculated as Al/control, and –control/Al for up and down-regulated proteins respectively. All ratios shown are statistically significant ( $p < 0.05$ ).

doi:10.1371/journal.pone.0063428.t001

frequency of 50 Hz, repetition rate of 200 HZ, UV wavelength of 355 nm, and accelerated voltage of 20,000 V. Peptide mass fingerprint data were matched to the NCBI database using Profound program under 50 ppm mass tolerance.

### Peptide and Protein Identification by Database Search

Data were processed using the Data Explorer software (Applied Biosystems) and proteins were unambiguously identified by searching against a comprehensive non-redundant sequence database (NCBI) using the MASCOT software search engine

([http://www.matrixscience.com/cgi/search\\_form.pl?FORM-VER=2&SEARCH=MIS](http://www.matrixscience.com/cgi/search_form.pl?FORM-VER=2&SEARCH=MIS)). Folds of increase and decrease in Al exposed vs unexposed roots were calculated as treated/control and –control/treated for up- and down-regulated proteins, respectively. For single-peptide identified proteins, up- and down-regulation were assigned when the regulation factors were above 1.5 ( $p < 0.05$ ).

**Table 2.** Proteins whose expression were significantly induced (+) in XZ16 roots but down-regulated (–)/unchanged in XZ61, or unchanged in XZ16 but down-regulated in XZ61 under 200 μM Al stress.

| Spot ID                            | Protein name                                                                    | Accession number | MW, Da | pI   | AASC % | MP | Folds (Al vs controls) |       |        |
|------------------------------------|---------------------------------------------------------------------------------|------------------|--------|------|--------|----|------------------------|-------|--------|
|                                    |                                                                                 |                  |        |      |        |    | XZ16                   | XZ61  | Dayton |
| <b>Metabolism</b>                  |                                                                                 |                  |        |      |        |    |                        |       |        |
| U25 (U6*)                          | Putative aspartate aminotransferase [ <i>H. vulgare</i> subsp. <i>vulgare</i> ] | gi 89511843      | 45377  | 5.75 | 14     | 4  | +1.71                  | –1.34 | +1.20  |
| U26 (U7)                           | Predicted: pirin-like protein [ <i>Brachypodium distachyon</i> ]                | gi 357114735     | 41337  | 9.37 | 17     | 8  | –1.25                  | –2.05 | +1.10  |
| <b>Energy</b>                      |                                                                                 |                  |        |      |        |    |                        |       |        |
| U27 (U11)                          | Fructose-bisphosphate aldolase [ <i>H. vulgare</i> ]                            | gi 226316443     | 39071  | 6.08 | 29     | 7  | +2.06                  | –1.22 | +1.11  |
| U28                                | Os09g0535000 [ <i>O. sativa japonica</i> ]                                      | gi 115480367     | 32715  | 6.96 | 34     | 9  | +10 <sup>6</sup>       | +1.29 | 0.00   |
| U29                                | Bp2A protein [ <i>T. turgidum</i> subsp. <i>dicoccoides</i> ]                   | gi 133872436     | 25759  | 5.86 | 27     | 5  | +1.71                  | –1.72 | 0.00   |
| U30                                | Phosphoglycerate mutase [ <i>T. aestivum</i> ]                                  | gi 32400802      | 29615  | 5.43 | 52     | 14 | +1.94                  | +1.38 | +1.74  |
| U31                                | Enolase (2-phosphoglycerate dehydratase) [ <i>O. sativa japonica</i> ]          | gi 780372        | 48299  | 5.42 | 18     | 7  | +1.25                  | –1.72 | +2.53  |
| U32                                | atp1 [ <i>Secale strictum</i> ]                                                 | gi 166165274     | 53979  | 6.01 | 31     | 14 | +1.15                  | –4.10 | +1.29  |
| <b>Cell growth/division</b>        |                                                                                 |                  |        |      |        |    |                        |       |        |
| U33 (U12)                          | Predicted: proliferating cell nuclear antigen-like [ <i>B. distachyon</i> ]     | gi 357137519     | 29514  | 4.61 | 14     | 5  | +2.16                  | +1.08 | –1.15  |
| <b>Protein destination/storage</b> |                                                                                 |                  |        |      |        |    |                        |       |        |
| U34                                | Heat shock 70 kda protein [ <i>Z. mays</i> ]                                    | gi 226500540     | 72989  | 5.62 | 10     | 4  | +1.21                  | –1.97 | +1.07  |
| U35 (U17)                          | Heat shock protein [ <i>Spinacia oleracea</i> ]                                 | gi 425194        | 71231  | 5.15 | 22     | 12 | +1.92                  | –1.25 | –1.01  |
| U36 (U18)                          | Cytosolic heat shock protein 90 [ <i>H. vulgare</i> ]                           | gi 32765549      | 80654  | 4.96 | 27     | 15 | +1.12                  | –2.91 | +1.15  |
| U37 (U19)                          | Cytosolic heat shock protein 90 [ <i>H. vulgare</i> ]                           | gi 32765549      | 80654  | 4.96 | 17     | 9  | +1.05                  | –1.76 | –1.14  |
| <b>Transporters</b>                |                                                                                 |                  |        |      |        |    |                        |       |        |
| U38                                | Vacuolar proton-ATPase D subunit [ <i>T. aestivum</i> ]                         | gi 108925894     | 41321  | 4.89 | 46     | 10 | +1.05                  | –1.66 | +1.12  |
| <b>Signal transduction</b>         |                                                                                 |                  |        |      |        |    |                        |       |        |
| U39                                | 14-3-3D protein [ <i>H. vulgare</i> subsp. <i>vulgare</i> ]                     | gi 83271056      | 28742  | 4.80 | 44     | 9  | +1.31                  | –1.58 | +1.10  |
| <b>Disease/defense</b>             |                                                                                 |                  |        |      |        |    |                        |       |        |
| U40                                | Phenylalanine ammonia-lyase [ <i>Phyllostachys edulis</i> ]                     | gi 224998176     | 76278  | 6.15 | 19     | 12 | +1.21                  | –3.50 | +1.96  |
| <b>Unknown</b>                     |                                                                                 |                  |        |      |        |    |                        |       |        |
| U41                                | Predicted protein [ <i>H. vulgare</i> subsp. <i>vulgare</i> ]                   | gi 326496891     | 38099  | 4.83 | 25     | 7  | +2.08                  | –1.79 | +1.22  |
| U42                                | Hypothetical protein Sb01g000380 [ <i>S. bicolor</i> ]                          | gi 242032147     | 60974  | 5.20 | 21     | 9  | +1.09                  | –2.03 | +1.36  |
| U43 (U23)                          | Predicted protein [ <i>H. vulgare</i> subsp. <i>vulgare</i> ]                   | gi 326513540     | 58531  | 6.05 | 22     | 40 | +1.84                  | –1.11 | –3.17  |
| U44 (U24)                          | Predicted protein [ <i>H. vulgare</i> subsp. <i>vulgare</i> ]                   | gi 326513418     | 35914  | 5.06 | 22     | 9  | –1.32                  | –3.34 | –1.27  |

\* Spot U25 is the same protein spots as U6 identified in 50 μM Al stress.

Protein spot ID refers to numbers in Fig. 7. Accession number of top database match from the NCBI nr database. 'Al vs control' referred to fold variation of Al exposed vs unexposed plants. Fold increase and decrease were calculated as Al/control, and –control/Al for up and down-regulated proteins respectively. All ratios shown are statistically significant ( $p < 0.05$ ).

doi:10.1371/journal.pone.0063428.t002

## qRT-PCR Analysis

Total RNA was isolated from roots with the TRIzol reagent following manufacturers' recommendation (Invitrogen, Karlsruhe, Germany). cDNA samples were assayed by quantitative real time PCR (qRT-PCR) in the iCycler iQTM Real-time PCR Detection System (Bio-Rad, Hercules, CA, USA) using the SYBR Green PCR Master Mix (Applied Biosystems). The PCR conditions consisted of denaturation at 95°C for 3 min, followed by 40 cycles of denaturation at 95°C for 30 s, annealing at 58°C for 45 s and extension at 72°C for 45 s. Gene-specific primers (Table S1) were designed using the Primer Express software (Applied Biosystems). Barley *actin* gene was used as control (AY145451) fw-5'-GACTCTGGTGATGGTGTTCAGC-3', rv-5'-GGCTGGAA-GAGGACCTCA-3'.

## Statistical Analysis

Statistical analysis were performed using the Data Processing System (DPS) Software Package [16]. Statistical significance of the data was evaluated by two-way ANOVA using Duncan's multiple range test (SSR).

## Results

### Tibetan Wild Barley XZ16 Is Highly Tolerant to Al Toxicity

Time of appearance and severity of Al toxicity symptoms differed greatly among the three genotypes (Figure S1). XZ16 was less affected by 24 h exposure to 50 or 200 μM Al (pH 4.3), whereas XZ61 was obviously affected, as reflected by severe root growth inhibition. No significant difference between control and 50 or 200 μM Al stressed plants was found in root DW (dry weight) of XZ16, and the whole plant DW of XZ16 and Dayton. However, root and the whole plant DW of XZ61 decreased by

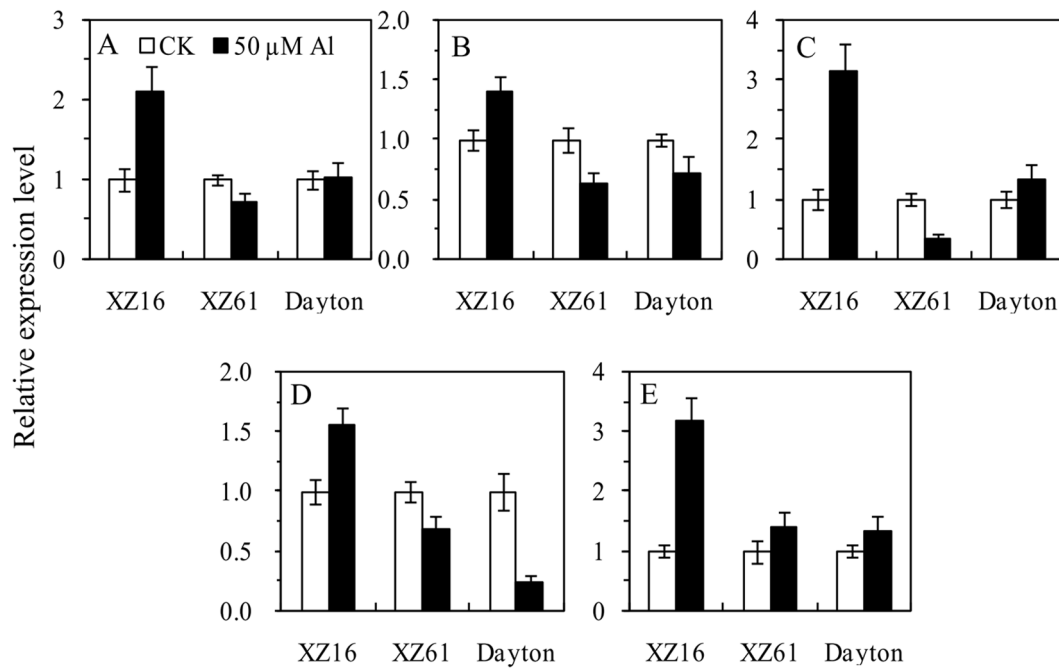

**Figure 5. Three root proteins associated with low pH isolated from the root of XZ16.** Representative 2-DE maps of root proteins isolated from XZ16 exposed to pH 4.3 for 24 h (A). ‘Spot view’ of the abundance of differentially expressed proteins that were significantly higher expressed (+) in XZ16 compared with Dayton roots under control condition at pH 4.3 (XZ16 vs Dayton) but suppressed (–) at pH 6.0 (B). doi:10.1371/journal.pone.0063428.g005

10.7% and 7.8% (50  $\mu$ M Al *vs* control) and by 19.1% and 13.5% (200  $\mu$ M Al *vs* control), respectively.

Al localization in barley roots exposed to different Al levels for 24 h was monitored by morin fluorescence using confocal laser scanning microscopy (Figure 1A), and fluorescence intensity of image analysis was calculated using Image J software (Figure 2B). Root Al fluorescence showed that root Al concentration increased with increasing external Al levels. XZ16 exhibited similar fluorescent signal in root tips with Dayton, being significantly ( $p < 0.05$ ) less than that of XZ61 in both Al levels.

As to root Al accumulation, there was no significant difference between XZ16 and Dayton, but both exhibited significantly ( $p < 0.05$ ) less accumulation than that of XZ61 in the two Al levels (Figure S2A). Shoot Al accumulation, however, was significantly lower ( $p < 0.05$ ) in XZ16 than in Dayton and XZ61 in response to Al treatments (Figure S2B). The transferring rates from roots to shoots among them were not differed significantly except that Dayton showed 18.2% and 13.6% higher than XZ16 and XZ61 when exposed to 50 and 200  $\mu$ M Al stress, respectively (Figure S2C). The above results indicate that Tibetan wild barley XZ16 is highly tolerant to Al stress.

### Differential Al-induced Protein Expression in Roots of the Three Genotypes

Approximately 2268 spots, ranging from 2038 to 2642, were resolved in each of two reproducible SDS-polyacrylamide gels (Figure 2). Protein spots altered by Al stress in Al-tolerant genotypes XZ16 and Dayton and Al-sensitive XZ61 or differentially accumulated among the three genotypes under Al stress were further analyzed and shown in Figure 3. For the protein spots altered by 50 and 200  $\mu$ M Al stress, 398, 334, 495 spots (50  $\mu$ M Al *vs* control) and 251, 447, 350 spots (200  $\mu$ M Al *vs* control) were up-regulated in XZ16, XZ61, Dayton, respectively; while 347, 306, 442, and 398, 334, 495 spots were down-regulated. In XZ16 and

Dayton, the abundance of 101 and 31 spots increased and that of 49 and 39 decreased in response to 50 and 200  $\mu$ M Al, respectively.

Al-responsive protein spots (44 spots, U1–U24, U25–U44; Figure 4) were analyzed by MALDI-TOF/TOF MS, and identified by MS/MS data with significant probability ( $p < 0.05$ ). Twenty-four and 20 spots were up-regulated (fold change  $> 1.50$ ) in XZ16 but unaltered/down-regulated in XZ61, or unaltered in XZ16 but down-regulated in XZ61 under 50 (U1–U24, Figure 2A, Table 1) and 200  $\mu$ M Al (U25–U44, Figure 2B, Table 2), respectively. The resulting spectra of the 44 protein spots (nine spots overlapped at 50 and 200  $\mu$ M Al, as shown in brackets in Table 2, were identified using MASCOT software search engine against *H. vulgare* and homologous proteins of other green plants in the NCBI non-redundant (nr) protein database and barley ESTs databases (Tables 1 and 2). These proteins were classified into nine groups based on their biochemical functions [17]. The majority of the protein profile was energy (spots U8–U11, U27–U32) and metabolism (U1–U7), followed by protein destination/storage (U14–U19 and U34–U37) and unknown (U21–U24, U41 and U44). The other six minor groups included signal transduction (U20 and U39), cell growth/division related proteins (U12), protein biosynthesis (U13), transporter (U38) and disease/defense (U40). Further comparison of the 44 identified spots with that of Dayton revealed that 16 (Spots U1, U4, U5, U6 (U25), U9, U11 (U27), U12 (U33), U13, U17 (U365), U20, U21, U22, U23 (U43), U28, U29 and U41; Tables 1 and 2) proteins up-regulated in XZ16 were surprisingly down-regulated or unaltered in both Dayton and XZ61. There were a protein uniquely expressed (U9, ATP synthase beta subunit) in XZ16 and three proteins not expressed in Dayton [U1, S-adenosylmethionine synthase 3 (SAMS); U28, a homologue of triosephosphate isomerase (TPI); U29, Bp2A protein]. On the contrary, three proteins (U18, U31,



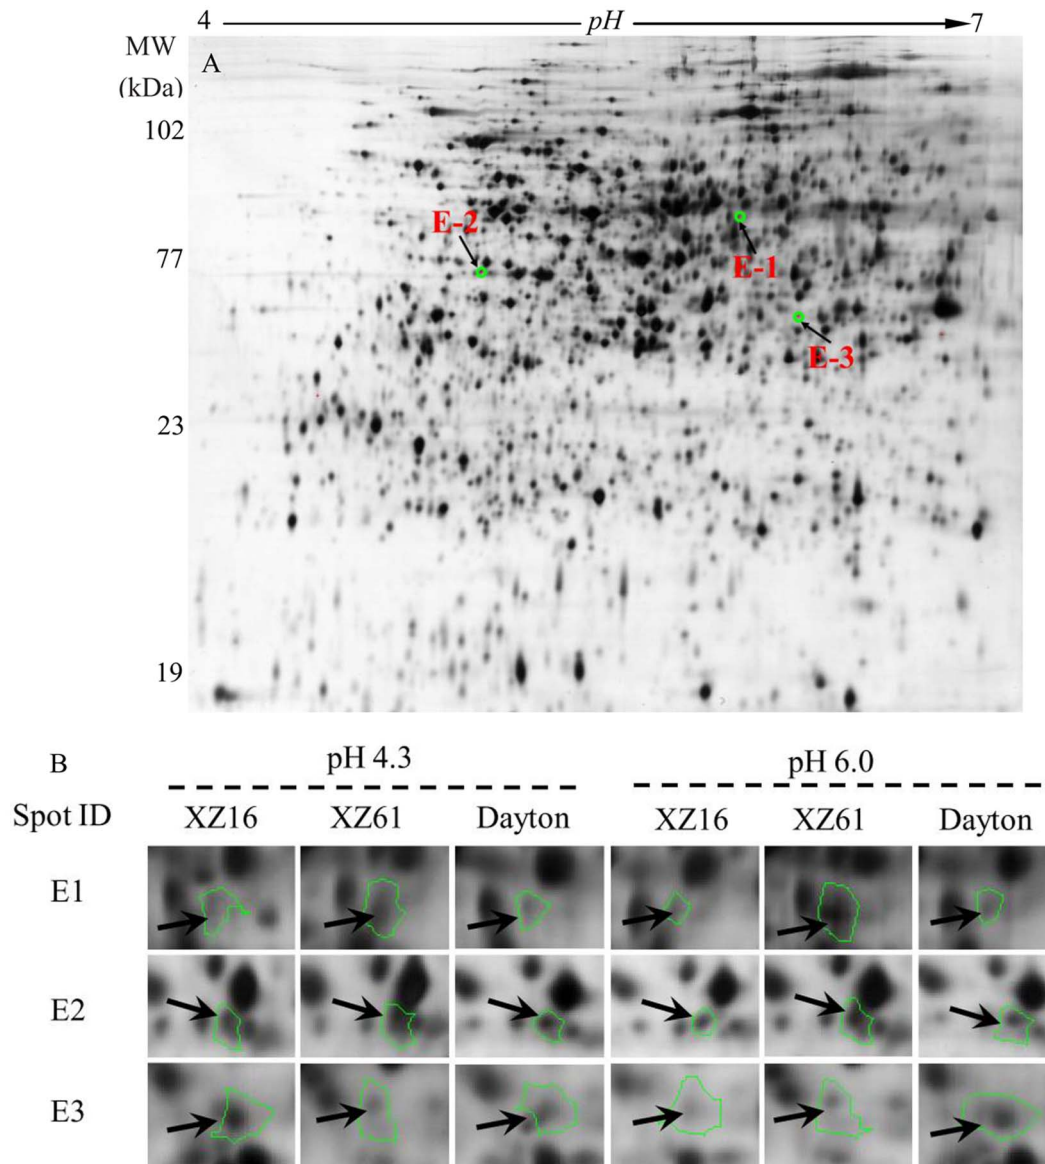

**Figure 6. Effect of 50  $\mu$ M Al on the transcript levels of gene expression encoding selected proteins of three barley genotypes exposed to 50  $\mu$ M Al for 24 h.** (A) S-adenosylmethionine synthase 3 (SAMS3, spot U1); (B) methionine synthase (MeSe, spot U2); (C) glutamine synthetase (GS, spot U4); (D)  $\gamma$ -glutamylcysteine synthetase ( $\gamma$ -GCS, spot U5) and (E) ATP synthase beta subunit proteins in roots (spot U9) of three barley genotypes exposed to 50  $\mu$ M Al for 24 h. Error bars represent SD values (n=3). doi:10.1371/journal.pone.0063428.g006

and U40) were slightly up-regulated in Dayton under Al stress, but unaltered in XZ16.

Six chaperone-related proteins were identified: heat shock protein (HSP, U17), HSP 93-V (U15), cytosolic HSP 90 (U18 and U19), HSP organizing protein (U14) and HSP 70 kDa (U34). These spots showed normal expression in XZ16 and Dayton, but were down-regulated in XZ61 under Al stress (Tables 1 and 2), indicating that these proteins are involved in Al detoxification in both XZ16 and Dayton.

In addition, expression of three proteins, classified as the energy category (Figure 5 and Table S2) was significantly higher in XZ16 *vs* Dayton under control condition at pH 4.3, and simultaneously suppressed at pH 6.0. They are predicted to be 6-phosphogluconate dehydrogenase decarboxylating-like isoform 1 (6-PGDH) (E1), plastid glutamine synthetase isoform GS2b (E2) and iron

deficiency specific clone no. 3 (IDS3) (E3). These proteins are potentially responsible for the low pH tolerance in XZ16 compared with Dayton.

### XZ16 Shows Higher Expression of Genes Corresponding to Al Up-regulated Proteins

To determine whether the changes in protein abundance detected by 2-DE were correlated with changes at the transcriptome level, quantitative RT-PCR was performed using RNA isolated from the roots of a separate set of plants treated with 0 or 50  $\mu$ M Al for 24 h (Figure 6 and Table S2). Transcript levels of five Al-regulated genes including *SAMS3*, *MeSe*, *GS*,  $\gamma$ -*GCS* and *ATP synthase beta subunit* (U1, U2, U4, U5 and U9) were chosen and successfully detected. Among them, *SAM3*, *MeSe*, *GS* and  $\gamma$ -*GCS* were up-regulated in XZ16 and down-regulated in XZ61,

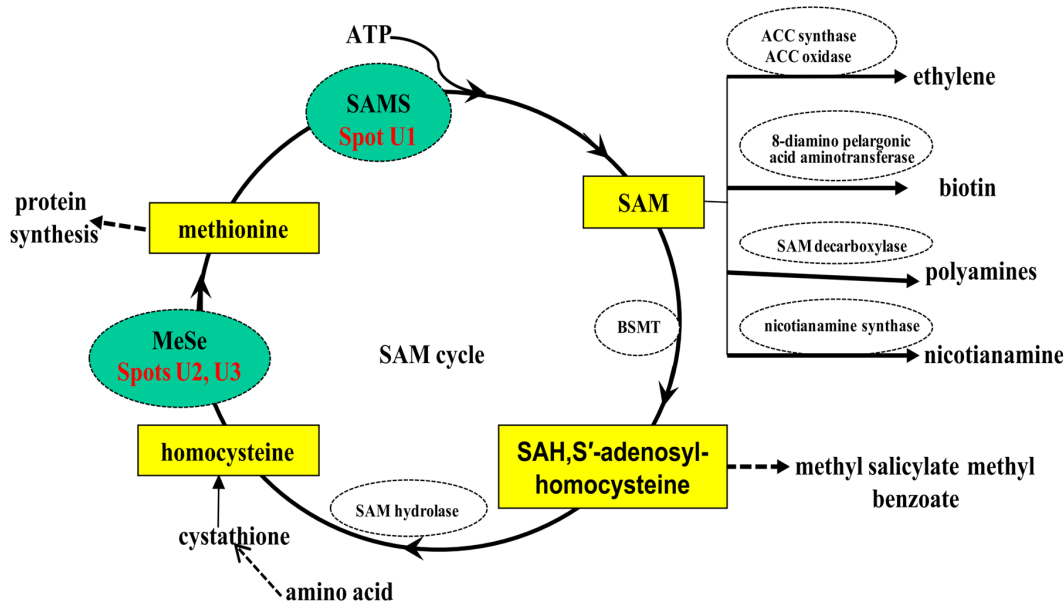

**Figure 7. Two of identified SAM cycle-related enzyme proteins SAMS and MeSe (green oval-shaped box) associated with Al-tolerance in Tibetan wild barley XZ16.** SAM regeneration and utilization reactions of the SAM cycle are depicted. Enzymes of SAM cycle are: MeSe, methionine synthase; SAMS, SAM synthetase; BSMT, benzoic acid/salicylic acid: S-adenosyl-methionine carboxyl methyltransferase; SAM hydrolase. SAH, S'-adenosyl-homocysteine; ACC, 1-aminocyclopropane-1-carboxylate. ACCS, 1-aminocyclopropane-1-carboxylic acid synthase. doi:10.1371/journal.pone.0063428.g007

following the expression trend detected by 2-DE (Table 1). Fifty micromolar of Al significantly up-regulated *ATP synthase beta subunit* by 3.2 folds in XZ16 compared to the control, but no change was detected in XZ61 and Dayton (Figure 6).

For genome mapping, BLASTn and CAP3 were used to blast the *Brachypodium distachyon* protein databases. The top hits were then mapped to barley chromosome based on barley genome zipper and sequence [18], [19]. Finally, 32 (including 30 of the 35 Al-tolerance related proteins, and 2 of the 3 low pH responsive spots) out of the above 38 proteins were linked to their corresponding candidate genes in barley genome (Table S3). The mapping of these candidate genes provides a short cut for the identification and transformation of Al responsible genes in future.

## Discussion

The current study showed that Al-tolerant Tibetan wild barley XZ16 is characterized by less Al accumulation both in roots and shoots (Figure 1 and Figure S2). Our current data is the first study to identify Al-responsive proteins in Tibetan wild barley (XZ16) using a proteomic approach. Barley is one of the most Al sensitive cereal species and responds to Al toxic ion immediately through releasing organic acid in roots [3,35]. It is important to successfully induce Al-tolerant-specific-proteins before visible morphological-stress-symptoms for plants to achieve tolerance to Al toxicity. In addition, the micro- and minor- elements, containing in the nutrient solution for the long term Al exposure of 15 days, trends to complicatedly react with Al ion compared to simplified adding  $\text{Ca}^{2+}$  solution. Furthermore, after long term Al treatment, barley roots (especially in sensitive genotype) is severely damaged, out of vigorosity and partly death, thus not suitable for protein extraction. Therefore, in this study, Al-tolerant-specific-proteins in wild genotype XZ16 were verified under 50  $\mu\text{M}$  or 200  $\mu\text{M}$  Al condition for 24 h. The treatment of 200  $\mu\text{M}$  Al on the plants could provide us the special mechanism (proteins) of Al tolerance in XZ16 in comparison to Dayton or XZ61 under high Al

concentration condition. Because Tibetan wild barley XZ16 and XZ61 are the two contrasting genotypes with different Al tolerances, the Al-regulated proteins identified using comparative proteomics will provide a good foundation to elucidate the mechanisms involved in Al-tolerance/resistance in Tibetan wild barley. Here we identified 35 proteins associated with Al-tolerance in wild barley XZ16 (Figures 2, 5 and Tables 1, 2). There were 16 proteins, up-regulated in roots of XZ16 but down-regulated or unaltered in both Dayton and XZ61, indicating their specificity and importance for Al tolerance in XZ16. Among them, four proteins (SAMS3, U1; ATP synthase beta subunit, U9; Os09g0535000, U28; Bp2A protein, U29), were markedly induced by Al stress in XZ16 but not in Dayton, while repressed in XZ61. Obviously, XZ16 has different stress response and defense mechanisms against Al stress as Dayton did. Further examination of these proteins may elucidate the mechanism of Al tolerance in XZ16 and provide new genetic materials for developing Al-tolerant crops. The selected stress-responsive proteins are discussed below according to their function.

## Metabolism Category

In the root proteomic analyses, seven of the identified proteins are involved in metabolism: SAMS3 (U1), methionine synthase (MeSe, U2 and U3), glutamine synthetase (GS, U4),  $\gamma$ -glutamyl-cysteine synthetase ( $\gamma$ -GCS, U5), putative aspartate aminotransferase (AST, U6) and predicted pirin-like protein (U7). SAMS, as an essential enzyme in cellular metabolism, has been long regarded as a 'housekeeping' function and it catalyzes the nucleophilic substitution reaction between methionine and ATP into SAM (S'-adenosyl-L-methionine) (Figure 7). SAM serves as an aminopropyl and methyl donor for ethylene and polyamine (PAs) [20], [21], [22]. It is well documented that ethylene and PAs are involved in response to biotic and abiotic stresses in plants [23], [24]. Thus SAMS plays an important role in Spd and Spm biosynthesis and stress response in plants [25], [26]. Qi *et al.* [27]

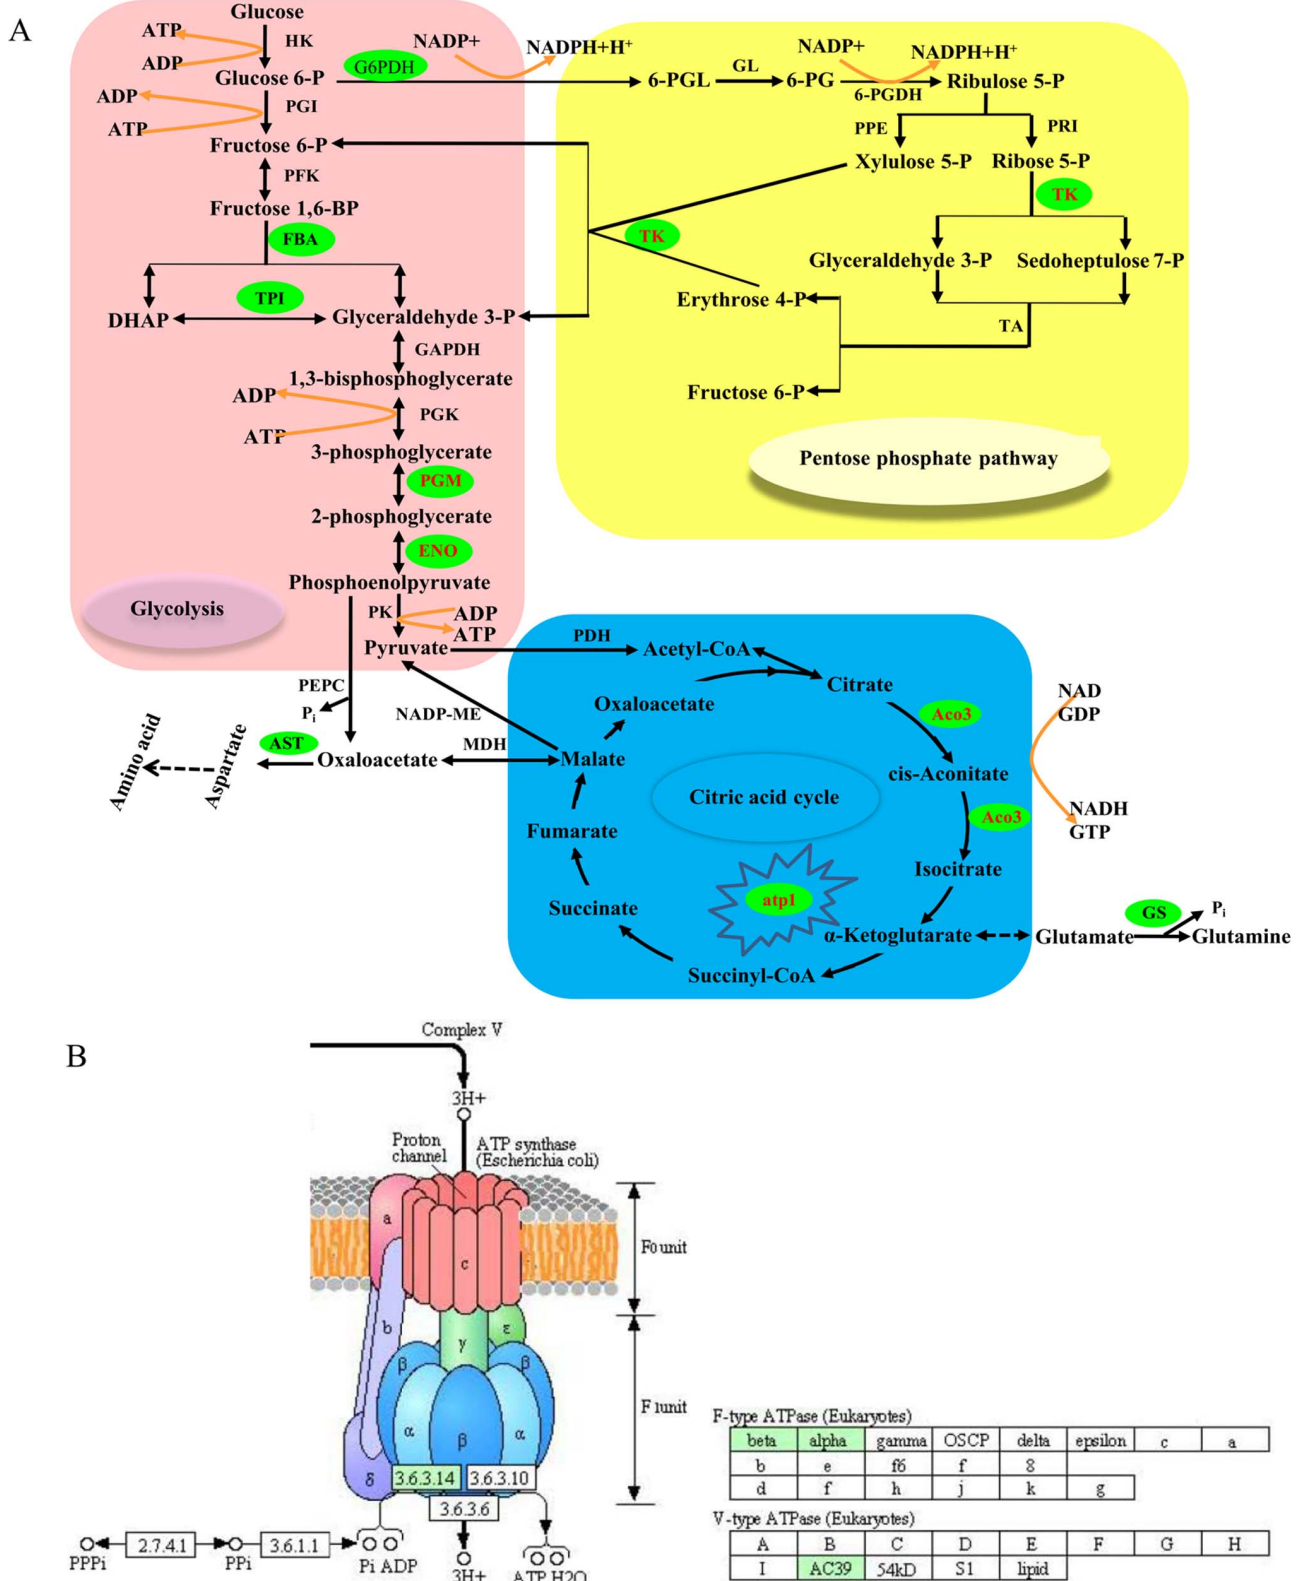

**Figure 8. Some of identified proteins (green oval-shaped box, cycle-related enzymes) associated with AI-tolerance involving in the metabolic pathways of glycolysis (purple box), pentose phosphate pathway (yellow box), and citric acid cycle (blue box) in Tibetan wild barley XZ16 (A). Searching via the KEGG (Kyoto Encyclopedia of Genes and Genomes), ATP synthase beta subunit (spot U9), atp1 (F-type ATP synthase  $\alpha$  subunit, spot U32) and V-ATPase (V-type ATPase AC39, spot 38) were represented by "3.6.3.14" in oxidative phosphorylation (B). Glucose 6-P either proceeds through glycolysis (participated by FBA, TPI, PGM and ENO) or the PPP (participated by TK) to produce pyruvate, which is converted to acetyl-CoA, entering the TCA cycle and producing citrate and malate (participated by Aco3). atp1 belongs to mitochondrial membrane ATP synthase generates ATP from ADP in the presence of a proton gradient across the membrane.**

Glutamine and other amino acids also feed by the TCA cycle; for example,  $\alpha$ -ketoglutarate can convert glutamate, which is converted to glutamine by GS; malate can be converted oxaloacetate, which is converted to aspartate through AST. Abbreviation: HK, hexokinase; PGI, phosphate isomerase; PFK, phosphofructokinase; BP, biphosphate; FBA, fructose-bisphosphate aldolase; TPI, triose phosphate isomerase; GAPDH, glyceraldehyde-3-phosphate dehydrogenase; PGK, phosphoglycerate kinase; PGM, phosphoglycerate mutase; ENO, enolase; PK, pyruvate kinase; G6PDH, glyceraldehyde 6-phosphate dehydrogenase; 6-PDL, 6-phosphogluconolactone; GL, gluconolactonase; 6-PG, 6-phosphogluconate; 6-PGDH, 6-phosphogluconate dehydrogenase; PPE, pentose phosphate epimerase; PRI, phosphoriboisomerase; TK, transketolase; TA, transaldolase; PDH, pyruvate dehydrogenase; CoA, coenzyme A; Aco3, aconitate hydratase 3; GS, glutamine synthetase; PEPC, phosphoenolpyruvate carboxylase; MDH, malate dehydrogenase; NADP-ME, NADP-malic enzyme; AST, aspartate aminotransferase.  
doi:10.1371/journal.pone.0063428.g008

found that over-expression of *Suaeda salsa* *SAMS2* in transgenic tobacco plants leads to an increase in polyamine (PAs) content and enhancement of salt tolerance. In the present study, *SAMS3* was up-regulated in XZ16 but not expressed in Dayton and repressed in XZ61 under 50  $\mu$ M Al stress, highlighting the function of this protein in Al tolerance of XZ16. Although SAM is the precursor of ethylene, the key enzyme of ethylene synthesis is ACCS [28] (Figure 7). Since ACCS was not identified in this study, further research is required to determine whether up-regulation of *SAMS3* is involved in ethylene-mediated inhibition of root growth and/or the alteration of cell wall and polymer structures in roots under Al stress. On the other hand, *SAMS3* was expressed normally in Dayton under Al stress as determined by qRT-PCR (Figure 6). Therefore, Al-induced expression of *SAMS3* is likely to be regulated at the post-transcriptional or translational level in Dayton.

In addition, we also observed that MeSe was depressed in XZ61 (U2 and U3), but not altered in XZ16 under Al stress. Higher MeSe levels would increase the amount of methionine for SAM synthesis (Figure 7). Enhanced accumulation of MeSe contributes to increase PAs biosynthesis, which is critical to plant survival in many environmental stresses [29]. The decreased accumulation of MeSe in XZ61 indicates that Al stress triggered damages in barley roots may be associated with the modification of amino acid metabolism and synthesis of other amino acids derived metabolites. The next important questions is how *SAMS3* and MeSe elaborate to cope with Al toxicity and which metabolism factors, e.g., SAM, ethylene, PAs (spermidine or spermine), are responsible for Al detoxification in conjunction with *SAMS3* and MeSe. Therefore, it is necessary to investigate the accumulation of related metabolite and enzymatic activities of the *SAMS* family for a better understanding of their functions in the Al stress response.

Two glutathione (GSH) synthesis proteins  $\gamma$ -GCS and GS (U4 and U5), play a pivotal role in various metabolic processes involved in plant growth and development and stress responses including Al toxicity [30], [31]. The pirin-like protein (U7 and U26) plays important roles in a number of different biological processes, however, its physiological role in plants remains unclear [32]. Aspartate aminotransferase (AST, U6 and U25) is a key antioxidative enzyme for detoxifying reactive oxygen species (ROS) under abiotic stresses [33]. Similarly, up-regulation of AST expression was reported in *Arabidopsis* in response to Al stress [34]. Under Al stress,  $\gamma$ -GCS (U5), GS and AST were significantly increased in XZ16, whereas dramatically decreased in XZ61 and Dayton (Table 1), again indicating that there a unique mechanism in Al tolerance for the Tibetan wild barley genotype.

### Energy Category

Similar to the proteomic results of Zhou *et al.* [10], ATP synthase beta subunit (U9) was only detected in XZ16 after 24 h of 50  $\mu$ M Al stress (Table 1), indicating that the energy provided to ATPase for active Al efflux and detoxification in XZ16 was increased when exposed to Al stress. qRT-PCR of *ATP synthase beta subunit* confirmed a remarkable increase in XZ16 but not in X61 and Dayton under 50  $\mu$ M Al (Figure 6). Therefore, we conclude

that ATP synthase beta subunit significantly contributes to the ATPase-mediated active Al efflux and detoxification, and is regulated at both transcriptional and translational level in XZ16 in response to Al.

In addition to ATP synthase beta subunit, we also identified another type of ATPase, *atp1* (U32), which was markedly down-regulated in XZ61 after Al stress, but remained unchanged in XZ16 and Dayton (Table 2). The efflux of Al-induced citrate and malate is usually mediated by anion channels and ATPase-driven active co-transporters [35], [36]. Interestingly, a significant increase in ATP synthase beta subunit and unchanged levels of *atp1* in XZ16 were consistent with higher root citrate and malate efflux, whereas the lack of ATP synthase beta subunit expression and the Al-induced severe inhibition of *atp1* in XZ61 were associated with lower citrate and malate secretion. These results firmly suggest that high level of ATP synthase beta subunit and *atp1* in XZ16, unlike that in Dayton, may partly contribute to the active OA transport and secretion during protection from Al-toxicity. Thus, we may speculate that a novel protein synthesis of ATP synthase beta subunit may be involved only in Al inducing organic acid secretion in Tibetan wild barley XZ16. Obviously, it deserves a more detailed investigation in the future.

A BLAST search revealed that Os09g0535000 (U28) is a homologue of triosephosphate isomerase (TPI). TPI was reported to be induced in rice [37] and maize [38] under drought stress, indicating the importance of cellular homeostasis maintenance and emphasizing the role of this protein in energy production. Enolase (ENO, U31) is responsive to salt, low and high temperature and anaerobic stresses [8], [39]. Spot U10, identified as aconitate hydratase 3 (Aco3), plays a role in regulating resistance to oxidative stress and cell death in *Arabidopsis* and *Nicotiana benthamiana* [40]. Spot U29, the Bp2A protein, was first identified in the wheat genome [41]. The present study is the first to examine Bp2A (U29) expression under Al stress. However, the function of this protein and its direct involvement in Al tolerance are poorly understood. Therefore, the mechanisms underlying the differential expression of this protein in different barley genotypes should be further explored.

In the glycolytic pathway, the levels of other Al stress responsive proteins fructose-bisphosphate aldolase (FBA, U11 and U27) and phosphoglycerate mutase (PGM, U30) were increased in XZ16 under Al treatments, consistent with the findings of Fukuda *et al.* [42] in rice under Al stress and Yan *et al.* [43] in the rice response to chilling. Down-regulation of Os06g0133800 (U8), a homologue to transketolase (TK), in XZ61 may reversibly inhibit ribose 5-phosphate, which is a substrate for nucleic acid synthesis associated with the synthesis of RNA under Al stress [42].

Taken together, up-regulation of FBA, PGM, TPI, Bp2A, and ATP synthase beta subunit (U11, U27, U30, U28, U29 and U9) and maintaining the normal expression levels of the other four energy proteins in XZ16 might help to produce more energy needed in the defense processes under Al stress conditions. The higher abundance of all these enzymes catalyzing various reactions in glycolysis, pentose phosphate pathway, and citric acid cycle in roots of Al resistant genotypes, suggest less Al-triggered disruption

of energy metabolism in XZ16 (Figure 8). Up-regulation of ATP synthase beta subunit, Bp2A, TPI and FBA is of particular importance to XZ16 relative to Dayton.

### Cell Growth/Division and Protein Biosyntheses Category

Proliferating cell nuclear antigen (PCNA) is an essential component in eukaryotic DNA synthesis [44]. PCNA interacts with many proteins and participates in a variety of metabolic processes, such as cell cycle control, nucleotide excision repair and post-replication mismatch repair [45]. Translation elongation factor 1 $\beta$  (EF1B, U13) is a highly conserved protein that catalyzes the exchange of bound GDP for GTP on EF-1 $\alpha$ , a required step to ensure continued protein synthesis. In our study, PCNA (U12 and U33) and EF1B (U13) were up-regulated in roots of XZ16, but were unchanged in XZ61 and Dayton. It suggests that XZ16 might possess a high activity of DNA replication machinery in response to Al stress, and EF1B may play an important role in maintaining the root elongation rate of XZ16 under Al stress.

In addition, the other specific protein up-regulated in XZ16 is the RNA-binding Ras-GAP SH3 binding protein (G3BP, signal transduction category, U20). Zhou *et al.* [46] reported that the expression of the *G3BP* gene was associated with fertility conversion in male-sterile wheat. However, the exact function of G3BP in RasGAP-dependent signaling remains to be defined. These results provide a starting point for further investigation into the functions of these proteins using genetic and other approaches.

In conclusion, the response and defense mechanisms of Al stress in XZ16 appear different from those of Dayton, as reflected by the different expressions of these specific proteins associated with Al tolerance under Al stress between XZ16 and Dayton or XZ61. There are four proteins (i.e. SAMS3, ATP synthase beta subunit, TPI, Bp2A protein), which are exclusively expressed in XZ16 not in Dayton and XZ61 under Al stress, indicating their crucial role in development of Al stress tolerance in XZ16, and novelty of genetic resource for Al-tolerance. In addition, as the functions of some differentially expressed proteins and their direct involvement

in stress tolerance are poorly understood, further studies are warranted to elucidate the underlying molecular and metabolic pathways for better understanding the mechanisms involved in Al-tolerance of wild barley and providing new genetic resources in Al-tolerant crop breeding.

### Supporting Information

**Figure S1 Effect of Al stress on root (A) and individual plant dry weight (B) of barely seedlings of XZ16, XZ61 and Dayton.**

(DOC)

**Figure S2 Al accumulation in roots (A) and shoots (B) and transferring rate from root to shoot (C) of barley seedlings of XZ16 (□), XZ61 (■) and Dayton (▨).**

(DOC)

**Table S1 Oligonucleotides used as primers for real-time RT-PCR.**

(DOC)

**Table S2 Proteins whose expression were significantly higher expressed (+) in XZ16 compared with Dayton roots under control condition at pH 4.3 (XZ16 vs Dayton) but suppressed (–) at pH 6.0.**

(DOC)

**Table S3 Thirty-two proteins (including 2 low pH responsive proteins E1 and E2) corresponding candidates were mapped to chromosome based on barley genome zipper information.**

(DOC)

### Author Contributions

Conceived and designed the experiments: FBW GPZ HXD. Performed the experiments: HXD XHC FBC MZ IMA. Analyzed the data: HXD ZHC. Wrote the paper: HXD FBW GPZ CDL ZHC.

### References

- Kochian LV, Pineros MA, Hoekenga OA (2005) The physiology, genetics and molecular biology of plant aluminum resistance and toxicity. *Plant Soil* 274: 175–195.
- Foy CD (1996) Tolerance of barley cultivars to an acid, aluminum-toxic subsoil related to mineral element concentrations in their shoots. *J Plant Nutr* 19: 1361–1380.
- Zhao ZQ, Ma JF, Sato K, Takeda K (2003) Differential Al resistance and citrate secretion in barley (*Hordeum vulgare* L.). *Planta* 217: 794–800.
- Kochian LV, Hoekenga OA, Pineros MA (2004) How do crop plants tolerate acid soils? - Mechanisms of aluminum tolerance and phosphorous efficiency. *Annu Rev Plant Biol* 55: 459–493.
- Pickering R, Johnston PA (2005) Recent progress in barley improvement using wild species of *Hordeum*. *Cytogenet Genome Res* 109: 344–349.
- Wang AH, Yu ZY, Ding Y (2009) Genetic diversity analysis of wild close relatives of barley from Tibet and the Middle East by ISSR and SSR markers. *Cr Biol* 332: 393–403.
- Dai HX, Shan WN, Zhao J, Zhang GP, Li CD, et al. (2011) Difference in response to aluminum stress among Tibetan wild barley genotypes. *J Plant Nutr Soil Sc* 174: 952–960.
- Xu CP, Sibicky T, Huang BR (2010) Protein profile analysis of salt-responsive proteins in leaves and roots in two cultivars of creeping bentgrass differing in salinity tolerance. *Plant Cell Rep* 29: 595–615.
- Zhen Y, Qi JL, Wang SS, Su J, Xu GH, et al. (2007) Comparative proteome analysis of differentially expressed proteins induced by Al toxicity in soybean. *Physiol Plantarum* 131: 542–554.
- Zhou S, Sauve R, Thannhauser TW (2009) Proteome changes induced by aluminum stress in tomato roots. *J Exp Bot* 60: 1849–1857.
- Liu TW, Fu B, Niu L, Chen J, Wang WH, et al. (2011) Comparative proteomic analysis of proteins in response to simulated acid rain in *Arabidopsis*. *J Proteome Res* 10: 2579–2589.
- Wu FB, Zhang GP, Dominy P, Wu HX, Bachir DML (2007) Differences in yield components and kernel Cd accumulation in response to Cd toxicity in four barley genotypes. *Chemosphere* 70: 83–92.
- Zheng SJ, Yang JL, He YF, Yu XH, Zhang L, et al. (2005) Immobilization of aluminum with phosphorus in roots is associated with high aluminum resistance in buckwheat. *Plant Physiol* 138: 297–303.
- Carpentier SC, Witters E, Laukens K, Deckers P, Swennen R, et al. (2005) Preparation of protein extracts from recalcitrant plant tissues: An evaluation of different methods for two-dimensional gel electrophoresis analysis. *Proteomics* 5: 2497–2507.
- Bah AM, Sun HY, Chen F, Zhou J, Dai HX, et al. (2010) Comparative proteomic analysis of *Typha angustifolia* leaf under chromium, cadmium and lead stress. *J Hazard Mater* 184: 191–203.
- Tang QY, Feng MG (1997) *Practical statistics and its DPS statistical software package*. Beijing, China: Agriculture Press.
- Bevan M, Bancroft I, Bent E, Love K, Goodman H, et al. (1998) Analysis of 1.9 Mb of contiguous sequence from chromosome 4 of *Arabidopsis thaliana*. *Nature* 391: 485–488.
- Mayer KF, Martis M, Hedley PE, Simkova H, Liu H, et al. (2011) Unlocking the barley genome by chromosomal and comparative genomics. *Plant Cell* 23: 1249–1263.
- Mayer KF, Waugh R, Langridge P, Close TJ, Wise RP, et al. (2012) A physical, genetic and functional sequence assembly of the barley genome. *Nature*.
- Tiburcio AF, Kaur-Sawhney R, Galston AW (1990) Polyamine metabolism. In: Miflin BJ, Lea PJ, eds. *The biochemistry of plants: a comprehensive treatise, intermediary nitrogen metabolism*. Orlando, USA: Orlando Academic Press, 283–325.
- Galston A, Kaur-Sawhney R (1995) Polyamines as endogenous growth regulators. In: Davies PJ, eds. *Plant hormones: physiology, biochemistry and molecular biology*. Dordrecht, Netherlands: Kluwer Academic Publishers, 158–178.
- McKeon TA, Fernandez-Maculet JC, Yang SF (1995) Biosynthesis and metabolism of ethylene. In: Davies PJ, eds. *Plant hormones: physiology, biochemistry and molecular biology*. Dordrecht, Netherlands: Kluwer Academic Publishers, 118–139.
- Heby O, Persson L (1990) Molecular-genetics of polyamine synthesis in eukaryotic cells. *Trends Biochem Sci* 15: 153–158.

24. Espartero J, Pintortoro JA, Pardo JM (1994) Differential accumulation of S-Adenosylmethionine synthetase transcripts in response to salt stress. *Plant Mol Biol* 25: 217–227.
25. Ma XL, Wang ZL, Qi YC, Zhao YX, Zhang H (2003) Isolation of S-adenosylmethionine synthetase gene from *Suaeda salsa* and its differential expression under NaCl stress. *Acta Bot Sin* 45: 1359–1365.
26. Gupta P, Duplessis S, White H, Karnosky DF, Martin F, et al. (2005) Gene expression patterns of trembling aspen trees following long-term exposure to interacting elevated CO<sub>2</sub> and tropospheric O<sub>3</sub>. *New Phytol* 167: 129–142.
27. Qi YC, Wang FF, Zhang H, Liu WQ (2010) Overexpression of *Suaeda salsa* S-adenosylmethionine synthetase gene promotes salt tolerance in transgenic tobacco. *Acta Physiol Plant* 32: 263–269.
28. Wang KLC, Li H, Ecker JR (2002) Ethylene biosynthesis and signaling networks. *Plant Cell* 14: S131–S151.
29. Flores HE, Protacio CM, Signs MW (1989) Primary and secondary metabolism of polyamines in plants. *Recent advances in phytochemistry* 23: 329–393.
30. Noctor G, Arisi ACM, Jouanin L, Kunert KJ, Rennenberg H, et al. (1998) Glutathione: biosynthesis, metabolism and relationship to stress tolerance explored in transformed plants. *J Exp Bot* 49: 623–647.
31. Ruiz J, Rivero R, Romero L (2006) Boron increases synthesis of glutathione in sunflower plants subjected to aluminum stress. *Plant Soil* 279: 25–30.
32. Kim MC, Chung WS, Yun DJ, Cho MJ (2009) Calcium and calmodulin-mediated regulation of gene expression in plants. *Mol Plant* 2: 13–21.
33. Valderrama R, Corpas FJ, Carreras A, Gomez-Rodriguez MV, Chaki M, et al. (2006) The dehydrogenase-mediated recycling of NADPH is a key antioxidant system against salt-induced oxidative stress in olive plants. *Plant Cell Environ* 29: 1449–1459.
34. Goodwin SB, Sutter TR (2009) Microarray analysis of Arabidopsis genome response to aluminum stress. *Biol Plantarum* 53: 85–99.
35. Ma JF, Ryan PR, Delhaize E (2001) Aluminium tolerance in plants and the complexing role of organic acids. *Trends Plant Sci* 6: 273–278.
36. Shen H, He LF, Sasaki T, Yamamoto Y, Zheng SJ, et al. (2005) Citrate secretion coupled with the modulation of soybean root tip under aluminum stress. Up-regulation of transcription, translation, and threonine-oriented phosphorylation of plasma membrane H<sup>+</sup>-ATPase. *Plant Physiol* 138: 287–296.
37. Salekdeh GH, Siopongco J, Wade LJ, Ghareyazie B, Bennett J (2002) Proteomic analysis of rice leaves during drought stress and recovery. *Proteomics* 2: 1131–1145.
38. Riccardi F, Gazeau P, de Vienne D, Zivy M (1998) Protein changes in response to progressive water deficit in maize. *Plant Physiol* 117: 1253–1263.
39. Forsthoefel NR, Cushman MAF, Cushman JC (1995) Posttranscriptional and posttranslational control of enolase expression in the facultative crassulacean acid metabolism plant *Mesembryanthemum crystallinum* L. *Plant Physiol* 108: 1185–1195.
40. Moeder W, del Pozo O, Navarre DA, Martin GB, Klessig DF (2007) Aconitase plays a role in regulating resistance to oxidative stress and cell death in Arabidopsis and *Nicotiana benthamiana*. *Plant Mol Biol* 63: 273–287.
41. Haudry A, Cenci A, Ravel C, Bataillon T, Brunel D, et al. (2007) Grinding up wheat: a massive loss of nucleotide diversity since domestication. *Mol Biol Evol* 24: 1506–1517.
42. Fukuda T, Saito A, Wasaki J, Shinano T, Osaki M (2007) Metabolic alterations proposed by proteome in rice roots grown under low P and high Al concentration under low pH. *Plant Sci* 172: 1157–1165.
43. Yan SP, Zhang QY, Tang ZC, Su WA, Sun WN (2006) Comparative proteomic analysis provides new insights into chilling stress responses in rice. *Molecular & Cellular Proteomics* 5: 484–496.
44. Kosugi S, Ohashi Y (1997) PCF1 and PCF2 specifically bind to *cis* elements in the rice proliferating cell nuclear antigen gene. *Plant Cell* 9: 1607–1619.
45. Daimon K, Kawarabayasi Y, Kikuchi H, Sako Y, Ishino Y (2002) Three proliferating cell nuclear antigen-like proteins found in the hyperthermophilic archaeon *Aeropyrum pernix*: Interactions with the two DNA polymerases. *J Bacteriol* 184: 687–694.
46. Zhou LL, Song GQ, Li HY, Hu YG, He BR (2010) Cloning and expression analysis of *TaG3BP* gene related to fertility conversion in male sterile lines of wheat. *Acta Agronomica Sinica* 36: 1683–1690.
